# Supplementary material for: Enhanced translation expands the endo-lysosome size and promotes antigen presentation during phagocyte activation
Source: PLoS Biol. 2019 Dec 4;17(12):e3000535. doi: 10.1371/journal.pbio.3000535 (PMC6913987; doi:10.1371/journal.pbio.3000535)
Supplement: S2 Data — (XLSX) [file pbio.3000535.s014.xlsx]

## Sheet: Fig2B
	Target	Control				LPS (2)				LPS (6)				LPS (2/4)				CHX				CHX+LPS
		Rep 1	Rep 2	Rep 3	Rep 4	Rep 1	Rep 2	Rep 3	Rep 4	Rep 1	Rep 2	Rep 3	Rep 4	Rep 1	Rep 2	Rep 3	Rep 4	Rep 1	Rep 2	Rep 3	Rep 4	Rep 1	Rep 2	Rep 3	Rep 4
	LAMP1	1	0.95	1	1	2.10036	1.99814	1.86654	1.9713	2.13577	1.93961	1.75014	1.91328	2.14735	1.88454	1.85289	1.84941	1	1	0.99	0.8	0.99912	1	1.33	1.16
	ATP6V1H	1	0.96	1	1	2.33707	1.91851	2.12648	2.54057	2.05956	1.67621	1.85909	2.41431	1.79163	1.9298	1.80177	2.18403	1	0.95	0.91	0.8	0.8	1.05	1.04	0.98
	ATP6V1D	1	1	1	1	2.38637	3.01864	2.86954	2.19406	1.54023	2.54057	1.91877	2.44593	1.45372	2.87039	1.9964	2.44803	0.839759	1.05998	0.940412	1.21812	0.965012	1.0186	0.974845	1.21501
	CtsD	1	1	0.99	0.9	1.56977	0.936008	1.09994	1.23879	0.983936	0.479083	0.749858	0.769134	1.37829	0.771634	0.812564	0.914213	1	1.1	0.95	0.99	1.0054	0.990931	1.00837	1.01704

## Sheet: Fig2D
	Total LAMP1 fluorescence /um3 (Normalized to resting for each replicate)
	Resting	LPS (2 h)	LPS (2/4 h)	LPS (6 h)
	Replicate 1
	1	1.15	1.96	1.4
	0.977	1.17	1.57	1.3
	0.888	0.994	1.58	1.15
	1.02	1.37	1.51	1.17
	1.05	1.3	1.94	1.14
	1.13	1.22	1.68	1.3
	1.15	1.18	1.59	1.38
	1	1.65	1.7	1.15
	1.09	1.6	1.81	1.46
	1.3	1.62	1.95	1.42
	1.17	1.25	1.93	1.21
	1.28	1.33	1.58	1.14
	1.26	1.25	1.43	1.23
	1.04	1.24	1.36	1.33
	1.02	1.35	2.05	1.43
	1.19	1.28	1.48	1.37
	1.22	1.3	1.57	1.33
	1.18	1.29	1.47	1.17
	1.21	1.17	1.53	1.34
	1.21	1.13	1.8	1.4
	1.18	1.26	1.57	1.43
	1.13	1.29	1.5	1.49
	1.18	1.65	1.45	1.37
	1.14	1.24	1.42	1.45
	1.23	1.08	1.33	1.4
	1	1.32	1.22	1.7
	1.17	1.08	1.34	1.42
	1.12	1.26	1.28	1.42
	1.15	1.17	1.17	1.45
	1.23	1.01	1.22	1.23
	1.09	1.17	0.999	1.4
	0.944	1.34	1.23	1.23
	0.838	1.18
	1.11	1.69
	1.17	1.55
	Replicate 2
	1	1.22	1.14	1.63
	1.07	1.28	1.24	1.52
	0.804	1.45	1.73	1.51
	1.12	1.34	1.01	1.66
	0.819	1.37	1.06	1.7
	1.06	1.35	1.29	1.52
	1.06	1.48	1.66	1.6
	0.899	1.2	1.41	2.07
	0.944	1.19	1.25	1.56
	1.05	1.22	1.97	1.83
	1.04	1.27	1.75	1.88
	0.797	1.19	1.32	1.79
	0.884	1.26	1.57	1.91
	0.849	1.26	1.57	1.65
	0.804	1.21	1.55	1.58
	0.867	1.31	1.56	1.59
	0.862	1.12	1.56	1.71
	0.882	1.21	1.55	1.69
	0.963	1.22	1.42	1.69
	0.865	1.31	1.43	1.61
	0.86	1.06	1.68	1.61
	0.913	1.48	1.71	1.67
	0.865	1.68	1.44	1.56
	0.909	1.74	1.73	1.65
	0.853	1.23	1.39	1.59
	0.864	1.6	1.38	1.42
	0.911	1.28	1.53	1.5
	0.882	1.87	1.45	1.57
	1.09	1.25	1.68	1.75
	1.16	1.92	1.45	1.65
	1.06	1.27	1.41	1.66
			1.38	1.59
				1.54
	Replicate 3
	1	1.25	1.85	1.66
	1.04	1.27	1.89	1.67
	1.1	1.11	1.81	1.6
	1.01	1.25	1.76	1.58
	0.978	1.81	1.8	1.59
	0.97	1.81	1.8	1.65
	1	1.81	1.77	1.65
	0.977	1.39	1.76	1.65
	0.966	0.707	1.68	1.57
	0.96	1.22	1.68	1.6
	0.96	0.783	1.97	1.59
	1.22	1.83	1.75	1.76
	1.21	1.77	1.68	1.76
	1.25	1.71	1.54	1.77
	1.18	1.66	1.65	1.77
	1.16	1.61	1.79	1.76
	1.19	1.62	1.67	1.56
	1.2	1.72	1.7	1.83
	1.22	1.72	1.79	1.68
	1.16	1.53	1.75	1.85
	1.19	1.51	1.75	1.54
	1.28	1.56	1.66	1.57
	1.15	1.59	1.62	1.57
	1.08	1.76	1.62	1.59
	1.28	1.93	1.67	1.45
	1.17	1.96	1.66	1.45
	1.15	1.7	1.8	1.59
	1.2	1.73	1.8	1.935
	1.18	1.66	1.6	1.71
	1.19	1.79	1.49	1.71

## Sheet: Fig2F
	Normalized Voxel Count
	Control	LPS	CHX	CHX+LPS
Rep 1	1	2.1	1.2	1.2
Rep 2	1	1.76	1.15	0.822
Rep 3	1	1.84	0.86	0.73
