# Supplementary material for: Enhanced translation expands the endo-lysosome size and promotes antigen presentation during phagocyte activation
Source: PLoS Biol. 2019 Dec 4;17(12):e3000535. doi: 10.1371/journal.pbio.3000535 (PMC6913987; doi:10.1371/journal.pbio.3000535)
Supplement: S13 Data — (XLSX) [file pbio.3000535.s025.xlsx]

## Sheet: S5_ Supp Fig5B
Data represented in S5_Supp Fig5B
	Phospho: Total p70S6K ratio (normalized to actin)
	Control	2 hr LPS	6 hr LPS	Torin1
Rep 1	1	2.775	3.05	0.149
Rep 2	1	4.27	4.96	0.112
Rep 3	1	3.575	4.46	0.177
Rep 4	1	1.818	2.02	0.18

## Sheet: S5_ Supp Fig5C
Data represented in S5_Supp Fig5C
	Phospho: Total 4EBP1 ratio (normalized to actin)
	Control	2 hr LPS	6 hr LPS	Torin1
Rep 1	1	1.57	1.6	0.21
Rep 2	1	1.198	1.262	0.12
Rep 3	1	1.206	1.357	0.018
Rep 4	1	1.291	1.533	0.05

## Sheet: S5_ Supp Fig5E
Data represented in S5_Supp Fig5E
	LC3 II/LC3 I ratio (normalized to actin)
	Resting	LPS (2h)	LPS (6h)	LPS (2/4h)	CHX (2h)	CHX + LPS (2h)	Torin1 (2h)	Torin1 + LPS (2h)	AKTi (2h)	AKTi + LPS (2h)	LY2 (2h)	LY + LPS (2h)	ConA (2h)	EBSS (2h)	EBSS (62)	EBSS + ConA (2h)
Rep 1	2.09128	0.789563	0.943023	0.579436	2.7293	1.7136	7.26445	5.36802	1.82165	1.22786	2.18033	1.4772	8.02657	9.31411	11.953	15.0918
Rep 2	2.71348	1.34541	1.82888	1.71932	2.9952	3.46528	8.95959	6.97598	2.61239	3.16258	2.4646	1.45464	9.39035	9.49063	11.3602	13.5694
Rep 3	1.84138	0.908714	1.22091	1.06348	4.6271	2.06481	5.64742	5.18748	2.02606	1.7268	2.48666	1.53725	9.40989	8.28726	9.48935	13.3499

## Sheet: S5_ Supp Fig5G
Data represented in S5_Supp Fig5G
	Levels of puromycylated proteins (normalized to actin)
	control	LPS 2 hr	LPS 6 hr	torin1 2hr	torin1 lps 2hr	chx 2hr	chx 2hr	torin1 6hr	torin1 lps 6hr
Rep 1	1	1.25963	1.43991	0.388248	0.386542	0.162952	0.162165	0.475031	0.500844
Rep 2	1	1.58999	1.99568	0.781745	0.598405	0.460148	0.32539	0.268202	0.295445
Rep 3	1	1.4544	1.63046	0.409052	0.409033	0.38571	0.378589	0.781184	0.827654
Rep 4	1	2.31466	2.3604	0.792828	0.732561	0.618648	0.653979	0.846821	0.771426

## Sheet: S5_ Supp Fig5H
Data represented in S5_Supp Fig5H
	Phospho: Total Ribosomal S6 ratio (normalized to actin)
	Resting	LPS	LY	LY + LPS
Rep 1	1	5.04605	1.0716	0.837199
Rep 2	1	4.42049	2.09574	2.99124
Rep 3	1	3.17057	0.433663	2.90526
Rep 4	1	8.87823	0.227787	1.65066
Rep 5	1	5.27535	0.552397	1.01191

## Sheet: S5_ Supp Fig5I
Data represented in S5_Supp Fig5I
		Resting				LPS (2h)				LY2 (2h)				LY2 + LPS (2h)
	Targets	Rep 1	Rep 2	Rep 3	Rep 4	Rep 1	Rep 2	Rep 3	Rep 4	Rep 1	Rep 2	Rep 3	Rep 4	Rep 1	Rep 2	Rep 3	Rep 4
	LAMP1	1	1	1	1	0.867817	0.868971	0.880045	0.780044	1.06485	0.97397	1.14314	1.1623	1.00629	1.03406	0.681596	1.11607
	ATP6V1H	1	1	1	1	1.25674	1.10196	1.04092	1.02427	1.11472	1.20597	1.16866	0.78774	1.09227	1.34426	1.19443	1.00541
	ATP6V1D	1	1	1	1	0.802082	0.994036	1.05973	0.783434	1.26007	1.17698	0.973143	1.26468	1.1017	0.864055	1.19594	0.921507
	B2M	1	1	1	1	1.1018	1.10452	1.09967	1.11354	1.08941	1.1151	1.01088	0.856999	0.912626	0.872877	0.90003	0.891748
	IL-6	1	1	1	1	2519.13	1946.65	2525.23	1291.17	6.85059	1.26745	1.17208	1.16838	378.36	92.2032	28.7238	95.9169
