# Supplementary material for: Enhanced translation expands the endo-lysosome size and promotes antigen presentation during phagocyte activation
Source: PLoS Biol. 2019 Dec 4;17(12):e3000535. doi: 10.1371/journal.pbio.3000535 (PMC6913987; doi:10.1371/journal.pbio.3000535)
Supplement: S17 Data — (XLSX) [file pbio.3000535.s029.xlsx]

## Sheet: S9_ Supp Fig9A
Data represented in S9_Supp Fig9A
		% LAMP1 mRNA per fraction (replicate 1)					% LAMP1 mRNA per fraction (replicate 2)
	Fraction #	Vehicle	LPS (6 hr)	Tor LPS (6 hr)		Fraction #	Vehicle	LPS (6 hr)	Tor LPS (6 hr)
	7	2.85581	6.06235	2.90821		7	2.85581	4.65653	5.12958
		0	0	0			0	0	0
	8	3.68135	0.273507	3.69705		8	3.68135	5.56874	5.18513
		0	0	0			0	0	0
	9	8.09668	0.341076	8.40933		9	8.09668	6.79559	4.47379
		0	0	0			0	0	0
	10	14.0642	2.79701	14.0012		10	14.0642	8.90625	10.1093
		0	0	0			0	0	0
	11	22.6741	9.10446	15.7668		11	22.6741	12.4165	20.3518
		0	0	0			0	0	0
	12	20.8877	31.2221	20.8707		12	20.8877	19.0737	20.2289
		0	0	0			0	0	0
	13	10.3941	25.6126	14.8585		13	10.3941	15.6903	14.2388
		0	0	0			0	0	0
	14	7.86307	15.1842	10.4454		14	7.86307	13.219	6.77465
		0	0	0			0	0	0
	15	5.46175	4.33836	4.71841		15	5.46175	6.79528	7.58674
		0	0	0			0	0	0
	16	4.02112	5.06431	4.32439		16	4.02112	6.87819	5.92124

## Sheet: S9_ Supp Fig9B
Data represented in S9_Supp Fig9B
		% ATP6V1H mRNA per fraction (replicate 1)					% APT6V1H mRNA per fraction (replicate 2)
	Fraction #	Vehicle	LPS (6 hr)	Tor LPS (6 hr)		Fraction #	Vehicle	LPS (6 hr)	Tor LPS (6 hr)
	7	4.75551	7.10618	2.11648		7	7.56714	5.03847	4.51038
		0	0	0			0	0	0
	8	5.92633	0.323695	3.32028		8	7.88556	7.72119	6.24844
		0	0	0			0	0	0
	9	6.70089	0.126064	4.87731		9	4.59845	4.57067	3.26501
		0	0	0			0	0	0
	10	9.43015	1.66563	8.66513		10	8.62522	9.27012	10.1506
		0	0	0			0	0	0
	11	14.0655	5.38393	9.60028		11	21.3406	13.8738	23.0877
		0	0	0			0	0	0
	12	12.2326	19.8808	11.181		12	14.8706	12.8043	13.5923
		0	0	0			0	0	0
	13	17.8403	18.0235	22.856		13	7.07271	9.94083	9.34064
		0	0	0			0	0	0
	14	8.22406	22.7055	12.4986		14	12.4519	23.3179	13.8525
		0	0	0			0	0	0
	15	11.3163	12.7273	12.4325		15	10.0236	8.59442	10.5871
		0	0	0			0	0	0
	16	9.50839	12.0573	12.4525		16	5.56421	4.86838	5.36537

## Sheet: S9_ Supp Fig9C
Data represented in S9_Supp Fig9C
		% ATP6V1D mRNA per fraction (replicate 1)					% APT6V1D mRNA per fraction (replicate 2)
	Fraction #	Vehicle	LPS (6 hr)	Tor LPS (6 hr)		Fraction #	Vehicle	LPS (6 hr)	Tor LPS (6 hr)
	7	1.86296	4.63705	1.25767		7	2.59254	2.60972	3.25964
		0	0	0			0	0	0
	8	1.13669	0.609224	1.6038		8	3.38107	3.47656	3.4331
		0	0	0			0	0	0
	9	9.10665	0.503912	5.81496		9	4.08886	3.33129	3.43193
		0	0	0			0	0	0
	10	15.0551	4.45902	13.6334		10	5.82995	6.22608	10.6482
		0	0	0			0	0	0
	11	17.7768	12.0219	13.8677		11	17.6009	12.2888	13.8335
		0	0	0			0	0	0
	12	21.1418	27.4192	23.5228		12	18.1211	14.4578	14.1605
		0	0	0			0	0	0
	13	11.3526	23.849	16.3906		13	12.149	18.5943	12.4713
		0	0	0			0	0	0
	14	11.0922	15.5097	13.5798		14	15.6463	21.5621	17.663
		0	0	0			0	0	0
	15	6.27247	4.88339	5.73492		15	13.4721	12.1997	13.9437
		0	0	0			0	0	0
	16	5.20278	6.10754	4.59429		16	7.11822	5.25374	7.15507

## Sheet: S9_ Supp Fig9D
Data represented in S9_Supp Fig9D
		% Actin mRNA per fraction (replicate 1)					% APT6V1D mRNA per fraction (replicate 2)
	Fraction #	Vehicle	LPS (6 hr)	Tor LPS (6 hr)		Fraction #	Vehicle	LPS (6 hr)	Tor LPS (6 hr)
	7	3.92362	5.8578	2.76706		7	6.19391	4.84246	5.39057
		0	0	0			0	0	0
	8	7.06547	2.23449	3.08288		8	9.35339	9.81812	5.03212
		0	0	0			0	0	0
	9	5.22537	2.02118	3.97899		9	3.3126	3.71093	2.74742
		0	0	0			0	0	0
	10	5.45129	1.61628	4.53252		10	5.64998	5.50012	6.63038
		0	0	0			0	0	0
	11	5.60565	5.42574	4.77108		11	8.41281	7.52508	7.764
		0	0	0			0	0	0
	12	5.73661	10.2821	6.55584		12	7.52413	6.3956	6.32777
		0	0	0			0	0	0
	13	10.4854	15.0258	13.2091		13	3.92672	8.18191	6.51182
		0	0	0			0	0	0
	14	31.1678	28.5245	29.3596		14	13.0507	11.5428	11.7883
		0	0	0			0	0	0
	15	14.2858	16.4666	22.9144		15	28.1646	21.9519	25.219
		0	0	0			0	0	0
	16	11.053	12.5455	8.82847		16	14.4111	20.5311	22.5886

## Sheet: S9_ Supp Fig9E
Data represented in S9_Supp Fig9E
		% PPIA mRNA per fraction (replicate 1)					% PPIA mRNA per fraction (replicate 2)
	Fraction #	Vehicle	LPS (6 hr)	Tor LPS (6 hr)		Fraction #	Vehicle	LPS (6 hr)	Tor LPS (6 hr)
	7	2.93243	1.13844	1.95087		7	1.92351	2.90989	3.57734
		0	0	0			0	0	0
	8	1.53583	0.276514	1.77237		8	1.80927	2.86282	3.1999
		0	0	0			0	0	0
	9	2.08534	0.165943	3.19479		9	2.88857	1.84619	2.98758
		0	0	0			0	0	0
	10	4.30731	2.49411	5.50317		10	2.36223	3.33462	8.48819
		0	0	0			0	0	0
	11	9.47083	9.08578	8.19524		11	5.94515	5.59428	6.78467
		0	0	0			0	0	0
	12	23.0871	26.6311	17.4724		12	12.2238	12.5186	13.5155
		0	0	0			0	0	0
	13	26.5624	30.0957	32.3797		13	22.6684	19.2778	19.3516
		0	0	0			0	0	0
	14	16.8717	18.9884	15.6842		14	28.767	34.6058	27.0214
		0	0	0			0	0	0
	15	7.7304	5.79426	8.60812		15	12.4668	10.0269	7.7157
		0	0	0			0	0	0
	16	5.41669	5.3297	5.2392		16	8.94521	7.02312	7.35807

## Sheet: S9_ Supp Fig9F
Data represented in S9_Supp Fig9f
		% B2M mRNA per fraction (replicate 1)					% B2M mRNA per fraction (replicate 2)
	Fraction #	Vehicle	LPS (6 hr)	Tor LPS (6 hr)		Fraction #	Vehicle	LPS (6 hr)	Tor LPS (6 hr)
	7	2.95075	4.27618	1.68623		7	2.94337	3.10455	3.37165
		0	0	0			0	0	0
	8	1.97981	0.440052	1.25309		8	2.79295	3.56614	3.17074
		0	0	0			0	0	0
	9	4.45308	0.278768	3.05818		9	3.95329	2.37574	2.53015
		0	0	0			0	0	0
	10	7.4833	2.50881	5.44067		10	5.19074	6.52642	6.53133
		0	0	0			0	0	0
	11	15.7049	12.8398	11.7476		11	18.4039	16.1931	14.0916
		0	0	0			0	0	0
	12	23.3991	27.2987	26.3024		12	25.3647	24.6423	22.9534
		0	0	0			0	0	0
	13	21.152	26.9444	25.8176		13	16.2489	20.7376	20.0837
		0	0	0			0	0	0
	14	12.1561	14.1567	13.3733		14	11.6997	13.7262	14.4925
		0	0	0			0	0	0
	15	5.62053	6.07967	6.08753		15	6.95217	4.85212	6.58905
		0	0	0			0	0	0
	16	5.10048	5.17694	5.23346		16	6.45024	4.27581	6.18591
