# Supplementary material for: Enhanced translation expands the endo-lysosome size and promotes antigen presentation during phagocyte activation
Source: PLoS Biol. 2019 Dec 4;17(12):e3000535. doi: 10.1371/journal.pbio.3000535 (PMC6913987; doi:10.1371/journal.pbio.3000535)
Supplement: S18 Data — (XLSX) [file pbio.3000535.s030.xlsx]

## Sheet: S10_Supp Fig10B
Data represented in S10_Supp Fig10B
	Total HEL-MHCII presentation (fluorescence intensity)
	Resting (no epitope) (6hr)	Resting + HEL	HEL + LPS (6hr)	HEL+ Torin1 (6hr)	HEL + LPS + Torin1 (6hr)	HEL + LY2 (6hr)	HEL + LPS + LY2 (6hr)
	0	466466	2.09116e+06	17444.3	415237	166757	0
	0	573259	347534	42469.2	236171	380877	360118
	0	558662	858041	133994	2977	174599	7061.14
	0	560786	858041	21408	284004	285679	0
	0	205140	1.35039e+06	155886	19957.9	0	0
	0	320995	683609	18639.3	89013.5	0	0
	0	283914	886287	23617.5	297	0	0
	0	384994	1.03402e+06	96258.2	3438.17	0	542890
	0	156590	47869.8	146593	3153	0	658480
	0	13881	199252	109352	0	0	0
	0	512305	696381	28928	162747	0	0
	0	666876	1.23252e+06	35923.5	314330	168443	0
	0	41916.8	1.31158e+06	11224.7	355212	0	278207
	0	0	15361.5	10537	0	232866	479120
	0	0	568978	36400.3	43585.8	0	584607
	0	424649	1.93899e+06	13398.2	39788.7	0	375009
	0	721122	1.30349e+06	14053.1	1206	0	69838.2
	0	48720.5	259308	19248	885	0	0
	0	838721	619228	58183.9	0	514868	0
	0	99547.6	265134	222037	0	35378	742087
	0	99547.6	350690	746261	10160.4	0	954595
	0	417922	537150	72922.3	9278.04	0	952878
	0	652275	428282	80315.3	2858	98194.4	1.16008e+06
	0	0	260278	35788.1	115713	0	0
	0	0	852043	891548	30716.3	0	0
	0	0	788143	556980	1792	0	0
	0	540182	1.07829e+06	233946	10160.4	0	874688
	0	13963.2	881426	695988	446589	0	1.11678e+06
	0	602595	311766	4543	18380.5	0	0
	0	803634	1.31965e+06	15538	48470.3	0	1.08992e+06
	0	0	344129	517952	67492.9	0	401303
	0	0	542551	14216	284393	0	447763
	0	275758	748099	38422.5	9286	0	0
	0	345794	714307	101382	315168	20735.6	0
	0	639100	308971	236002	403790	0	0
	0	669612	375512	21085	0	0	0
	0	127571	705249	5426.5	292295	25869.3	57408.1
	0	0	1.03686e+06	48408.7	2402	0	0
	0	240102	516263	15879.7	55077.2	0	0
	0	495503	414091	353089	7946	343726	371223
	0	736983	881256	356137	214747	0	0
	0	0	1.25225e+06	590435	292	1.56455e+06	0
	0	0	895354	14455.8	13784	0	0
	0	665172	485928	16604	13650	0	7056.54
	0	27583.6	2.18425e+06	304640	0	0	7021.7
	0	830071	1.2913e+06	57762	0	0	7044.75
	0	113680	0	0	0	0	0
	0	0	0	0	0	0	0
	0	0	0	36200	1527255	0	0
	0	22285.3	96739.9	0	802318	0	0
	0	3499.19	257590	0	0	360896	21447.1
	0	0	151505	0	0	131479	10253.4
	0	0	240360	0	0	142086	5192.61
	0	0	252060	0	0	220761	26683.2
	0	4905.25	241006	0	0	0	187209
	0	0	354670	0	0	0	32482.6
	0	0	0	0	0	0	0
	0	0	0	0	0	105828	0
	0	0	373707	0	0	8393.57	0
	0	0	544959	0	0	0	0
	0	288557	20759.4	0	0	0	343109
	0	3385.8	379800	0	0	0	555133
	0	0	439371	0	1103610	13539.1	297774
	0	0	41209	0	0	28128.3	36960.4
	0	96705.1	0	0	0	67470.1	232005
	0	4826.5	0	590836	214535	0	99697.4
	16323.8	3360	0	38300.7	320728	0	0
	16575.5	0	587922	0	495532	0	0
	30026.5	0	256059	0	227154	30207.8	0
	0	100517	0	728208	0	0	0
	0	3837.3	0	0	0	0	0
	4772	14808.2	305204	0	0	0	266930
	25348.3	78464.9	284591	0	193091	0	5578.57
	0	5781.78	167790	0	0	11607.8	69905.8
	0	0	395963	0	0	0	135732
	0	0	463217	0	0	0	0
	0	0	405901	0	0	0	0
	0	0	734882	0	0	0	0
	0	61670.7	523045	0	883613	3275	223226
	0	246528	405936	0	0	6244	404825
	0	121381	439790	0	0	0	87467.1
	0	224374	409515	0	0	0	379938
	0	52133.5	444254	0	668101	0	0
	0	587335	412070	0	0	0	0
	0	43225	337144	0	0	0	492668
	0	31571.2	481631	0	277809	0	0
	0	10311	593291	0	0	0	0
	0	0	464362	63812.3	0	0	0
	0	0	511699	0	0	0	0
	0	0	950934	0	595995	0	0
	0	1.58539e+06	1.36385e+06	0	0	3460	24680.6
	0	323798	572979	0	0	0	235574
	0	0	502050	0	0	0	0
	0	0	589763	0	485484	0	0
	0	0	799611	0	0	0	0
	0	414619	309218	344853	0	0	0
	0	314177	433933	0	0	0	3219
	0	41397.8	383113	0	0	38619.6	0
	0	39795.5	1.06416e+06	0	0	42534.5	0
	0	24198.6	790250	5361.65	0	0	0
	0	0	0	0	0	0	0
	0	0	0	0	0	0	0
	0	0	0	15035.4	364567	0	0
	0	0	377621	127957	237224	0	0
	0	0	131622	34907.9	466093	444511	323752
	0	512264	405821	258284	539166	582695	67769.4
	0	226699	397407	8404.25	773686	0	0
	0	0	314936	203892	389443	0	0
	0	0	174958	0	156840	0	578806
	4449.67	607417	692997	0	184398	0	691309
	4449.67	63658.4	371015	9481.97	0	0	0
	0	636415	461303	0	0	0	0
	0	157363	361875	0	0	0	0
	0	405010	57359.8	454619	228244	0	375578
	0	0	449546	218653	296928	0	0
	0	0	337220	91243.7	0	0	0
	0	0	599757	0	0	0	0
	0	358632	362822	0	0	0	0
	0	399026	1962	0	0	0	0
	0	100785	639982	0	0	0	0
	0	0	17878.8	0	0	0	493570
	0	0	1.04413e+06	0	294765	0	470389
	0	0	366521	130319	7039	0	295345
	0	0	180652	0	574838	0	680180
	0	0	109106	0	564653	0	273428
	0	0	347656	38406	466719	1.02772e+06	17774.5
	0	541423	293271	0	477539	245962	0
	0	37729.8	417661	0	590700	0	0
	0	0	1.01981e+06	0	397830	0	0
	0	0	474593	113851	786487	0	0
	0	0	438393	204484	327975	535172	0
	0	470309	160770	0	0	0	0
	0	225257	310374	0	0	0	0
	0	62543.5	226036	0	0	0	0
	0	226040	783999	793522	0	0	0
	0	305309	2309.67	96154.2	0	207135	0
	0	0	523371	280982	0	633240	0
	0	0	755496	18117	0	334237	0
	0	152664	34082.4	0	0	0	67377.6
	0	0	524787	0	0	0	0
	0	0	629008	0	0	0	0
	0	0	662840	0	0	0	0
	0	693876	754278			0	0
	0	94812.1	928758			129068	0
	0	137351	131682			0	759040
	0	516394	197796			0	186913
	0	327091	93681.4			0	0
	0	171621	1.09678e+06			872068	0
	0	0	0			878183	0
	0	0	0			0	0
	0	1.36711e+06	0			0	0
	0	0	0			0	6870.78
	0	0	0			0	0
	0	0	0			0	0
	0	0	0			0	0
	0	0	0			0	0
	0	0	0			0	0
